# Supplementary material for: Overexpression of thymidylate synthase (TYMS) is associated with aggressive tumor features and early PSA recurrence in prostate cancer
Source: PubMed Central journal article supplement (PMC4480759; doi:10.18632/oncotarget.3107), 2015-02-25
Supplement: oncotarget-06-8377-s001.pdf [file oncotarget-06-8377-s001.pdf]

## SUPPLEMENTARY TABLES

**Supplementary Table 1: Composition of the prognosis tissue microarray containing 11,152 prostate cancer specimens**

|                                 | No. of patients                                        |                                                          |
|---------------------------------|--------------------------------------------------------|----------------------------------------------------------|
|                                 | Study cohort on tissue microarray ( <i>n</i> = 11,152) | Biochemical relapse among categories ( <i>n</i> = 1,824) |
| <b>Follow-up (mo)</b>           |                                                        |                                                          |
| Mean                            | 53.4                                                   | -                                                        |
| Median                          | 36.8                                                   | -                                                        |
| <b>Age (y)</b>                  |                                                        |                                                          |
| <50                             | 318                                                    | 49                                                       |
| 50–60                           | 2,768                                                  | 460                                                      |
| 60–70                           | 6,548                                                  | 1,081                                                    |
| >70                             | 1,439                                                  | 232                                                      |
| <b>Pretreatment PSA (ng/ml)</b> |                                                        |                                                          |
| <4                              | 1,407                                                  | 142                                                      |
| 4–10                            | 6,735                                                  | 827                                                      |
| 10–20                           | 2,159                                                  | 521                                                      |
| >20                             | 720                                                    | 309                                                      |
| <b>pT category (AJCC 2002)</b>  |                                                        |                                                          |
| pT2                             | 7,370                                                  | 570                                                      |
| pT3a                            | 2,409                                                  | 587                                                      |
| pT3b                            | 1,262                                                  | 618                                                      |
| pT4                             | 63                                                     | 49                                                       |
| <b>Gleason grade</b>            |                                                        |                                                          |
| ≤3 + 3                          | 2,859                                                  | 193                                                      |
| 3 + 4                           | 1,565                                                  | 573                                                      |
| 4 + 3                           | 6,183                                                  | 849                                                      |
| ≥4 + 4                          | 482                                                    | 208                                                      |
| <b>pN category</b>              |                                                        |                                                          |
| pN0                             | 6,117                                                  | 1,126                                                    |
| pN+                             | 561                                                    | 291                                                      |
| <b>Surgical margin</b>          |                                                        |                                                          |
| negative                        | 8,984                                                  | 1,146                                                    |
| positive                        | 1,970                                                  | 642                                                      |

NOTE: Numbers do not always add up to 11,152 in the different categories because of cases with missing data.  
Abbreviation: AJCC, American Joint Committee on Cancer.

**Supplementary Table 2: Clinico-pathological association of TYMS immunostaining in ERG fusion negative cancers**

|                                 | <i>n</i> evaluable | TYMS IHC result |          |              |            | <i>p</i> value |
|---------------------------------|--------------------|-----------------|----------|--------------|------------|----------------|
|                                 |                    | negative (%)    | weak (%) | moderate (%) | strong (%) |                |
| <b>All cancers</b>              | 5,083              | 25.7            | 16.5     | 32.7         | 25.1       |                |
| <b>Tumor stage</b>              |                    |                 |          |              |            |                |
| pT2                             | 3,425              | 27.8            | 15.9     | 33.4         | 22.9       | <0.0001        |
| pT3a                            | 1,023              | 21.3            | 17.2     | 31.7         | 29.8       |                |
| pT3b                            | 593                | 21.1            | 18.7     | 30.7         | 29.5       |                |
| pT4                             | 26                 | 30.8            | 11.5     | 23.1         | 34.6       |                |
| <b>Gleason grade</b>            |                    |                 |          |              |            |                |
| ≤3 + 3                          | 1,160              | 37.2            | 14.1     | 33.0         | 15.7       | <0.0001        |
| 3 + 4                           | 2,831              | 23.8            | 17.7     | 34.5         | 24.1       |                |
| 4 + 3                           | 794                | 18.1            | 15.7     | 28.1         | 38.0       |                |
| ≥4 + 4                          | 276                | 19.2            | 16.3     | 26.1         | 38.4       |                |
| <b>Lymph node metastasis</b>    |                    |                 |          |              |            |                |
| N0                              | 2,898              | 23.7            | 16.8     | 31.9         | 27.5       | 0.173          |
| N+                              | 262                | 20.2            | 19.5     | 28.2         | 32.1       |                |
| <b>Preop. PSA level (ng/ml)</b> |                    |                 |          |              |            |                |
| <4                              | 539                | 32.8            | 15.2     | 33.0         | 18.9       | <0.0001        |
| 4–10                            | 3,008              | 25.8            | 16.9     | 34.2         | 23.1       |                |
| 10–20                           | 1,107              | 22.9            | 16.3     | 30.2         | 30.7       |                |
| >20                             | 382                | 22.0            | 14.9     | 28.5         | 34.6       |                |
| <b>Surgical margin</b>          |                    |                 |          |              |            |                |
| negative                        | 4,074              | 26.4            | 16.8     | 33.1         | 23.6       | <0.0001        |
| positive                        | 918                | 22.7            | 14.2     | 30.4         | 32.8       |                |

**Supplementary Table 3: Clinico-pathological association of TYMS immunostaining in ERG fusion positive cancers**

|                                 | <i>n</i> evaluable | TYMS IHC result |          |              |            | <i>p</i> value |
|---------------------------------|--------------------|-----------------|----------|--------------|------------|----------------|
|                                 |                    | negative (%)    | weak (%) | moderate (%) | strong (%) |                |
| <b>All cancers</b>              | 3,852              | 26.5            | 19.8     | 34.3         | 19.3       |                |
| <b>Tumor stage</b>              |                    |                 |          |              |            |                |
| pT2                             | 2,317              | 28.8            | 19.7     | 35.6         | 15.9       | <0.0001        |
| pT3a                            | 1,018              | 22.5            | 21.0     | 33.8         | 22.7       |                |
| pT3b                            | 476                | 23.3            | 18.5     | 29.6         | 28.6       |                |
| pT4                             | 23                 | 30.4            | 17.4     | 26.1         | 26.1       |                |
| <b>Gleason grade</b>            |                    |                 |          |              |            |                |
| ≤3 + 3                          | 875                | 34.7            | 15.3     | 37.6         | 12.3       | <0.0001        |
| 3 + 4                           | 2,279              | 25.1            | 21.1     | 34.5         | 19.3       |                |
| 4 + 3                           | 546                | 20.0            | 21.6     | 31.7         | 26.7       |                |
| ≥4 + 4                          | 128                | 21.9            | 21.1     | 19.5         | 37.5       |                |
| <b>Lymph node metastasis</b>    |                    |                 |          |              |            |                |
| N0                              | 2,145              | 24.4            | 20.0     | 34.2         | 21.4       | 0.0446         |
| N+                              | 222                | 22.5            | 19.8     | 32.0         | 25.7       |                |
| <b>Preop. PSA level (ng/ml)</b> |                    |                 |          |              |            |                |
| <4                              | 525                | 32.2            | 19.2     | 31.6         | 17.0       | <0.0001        |
| 4–10                            | 2,364              | 26.1            | 20.6     | 34.7         | 18.6       |                |
| 10–20                           | 678                | 22.9            | 19.2     | 34.8         | 23.2       |                |
| >20                             | 233                | 24.9            | 17.2     | 36.1         | 21.9       |                |
| <b>Surgical margin</b>          |                    |                 |          |              |            |                |
| negative                        | 3,034              | 27.4            | 20.2     | 34.2         | 18.2       | <0.0001        |
| positive                        | 748                | 23.5            | 18.9     | 34.1         | 23.5       |                |
